# Supplementary material
Source: HighWire-hosted journal article supplement (https://www.annfammed.org/highwire/filestream/15873/field_highwire_adjunct_files/0/CardenasSuppAppFigure.pdf)

## **Supplemental materials for**

**Cardenas K, Weilnau T, Aguilar C, et al. Partnering for integrated care: a learning collaborative for primary care and oral health teams. *Ann Fam Med.* 2023;21(Suppl 2):S22-S30.**

## **Supplemental Appendix.**

A future study, similar to the TISH project, will use a paired t-test to assess the mean of the pairwise difference between answers to Question 5 after and before the learning collaborative, defined (After - Before) (Table 3). Our null hypothesis was that the mean of this pairwise difference is zero; a mean of the pairwise difference whose 95% confidence interval (CI) does not include zero would indicate that training makes differences. Question 5 is representative of a primary project aim. Thus, a pairwise difference would suggest the accomplishment of the aim.

Due to the small sample size of the current study, the power to detect the difference was low. For our study to have 80% power, to detect an effect size = 0.5 and at a two-sided significance of 0.05, we would need to enroll 34 doctors.

## Supplemental Figure 1. Screening and referral data run charts

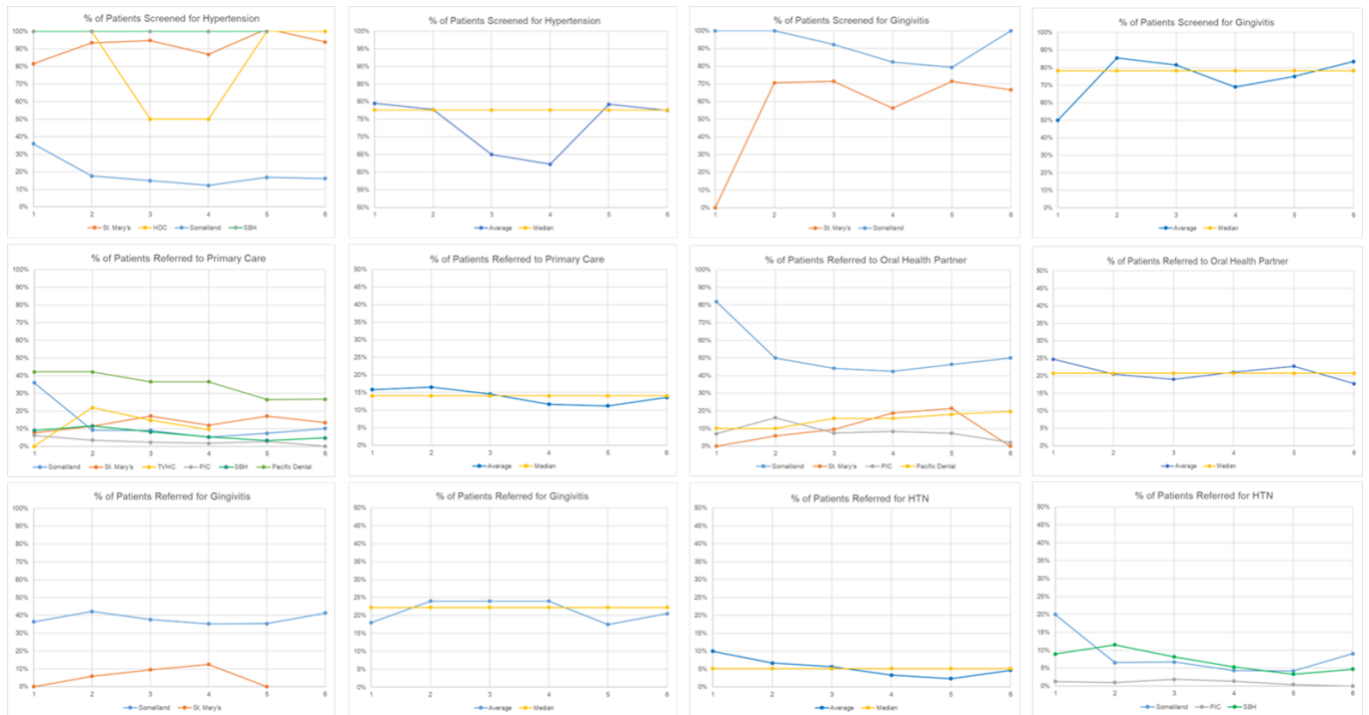

Supplement: CardenasSuppAppFigure.pdf [file CardenasSuppAppFigure.pdf]
